# Supplementary material for: Most microRNAs in the single-cell alga Chlamydomonas reinhardtii are produced by Dicer-like 3-mediated cleavage of introns and untranslated regions of coding RNAs
Source: HighWire-hosted journal article supplement (doi:10.1101/gr.199703.115), 2016-03-11

## SUPPLEMENTARY FIGURE LEGENDS

**Supplementary Figure S1.** Validation of the miRNA reporter system. (A) Detection by northern blot of the artificial (a)miRNA against *PSY* in total RNA samples from transgenic lines carrying the indicated constructs. These lines were grown in normal TAP until mid-log phase and then further incubated with nitrate TAP in the dark for 48 hours. (B) Phenotype in both normal and high light intensity conditions of transgenic lines analyzed in (A) when grown on solid media containing either ammonium or nitrate as the sole nitrogen source. (C) Relative levels of *PSY* mRNA in lines tested in (A) assessed by quantitative RT-PCR. (D) 5'RACE to test the specific cleavage of the *PSY* mRNA mediated by the amiRNA. Arrows and numbers indicate the positions and the frequencies of 5' termini of RACE products (top) aligned with the amiRNA (bottom). A schematic representation of the *PSY* mRNA with the location of the amiRNA cleavage site is also displayed.

**Supplementary Figure S2.** Effect of *dcl3* on expression of *PSY* mRNA. (A) Genotype by PCR of three independent alleles of *dcl3*. Top panel: schematic representation of *Cre07.g345900* (*DCL3*) indicating the primer pairs used for genotyping. Bottom panel: Analysis of PCR products from DNA triplicates of the indicated lines using the indicated primer pairs. (B) Relative levels of *PSY* mRNA in the indicated lines assessed by quantitative RT-PCR. The genetic background of each mutant strain is shown in parentheses. (C) Analysis of 5'RACE products produced by specific amiRNA-mediated cleavage of the *PSY* mRNA.

**Supplementary Figure S3.** Domain structure of RNaseIII-containing proteins. (A) The domains in the three DCL proteins from *C. reinhardtii* are shown in different colours (DEAD/DExH: helicase domain; Hel\_C: helicase domain; DUF: DUF283, putative dicer dimerization domain; RIII: RNaseIII domain; P-Rich: proline-rich domain) with the size of the protein indicated in number of amino acids (aa) on the right hand side. (B) Domains in the indicated DCLs (top panel) and Drosha proteins (bottom panel) using the colour code as in (A) (PAZ: Piwi, Argonaute, Zwillie domain). Protein sizes in aa are also indicated. Cr: *C. reinhardtii*; At: *Arabidopsis thaliana*; Hs: *Homo sapiens*; Dm: *Drosophila melanogaster*.

**Supplementary Figure S4.** Detection of newly identified high confidence miRNAs by northern blot. RNA samples from the indicated *C. reinhardtii* strains were probed for the presence of the specified miRNAs (for more details about these miRNAs, see Table 1). Asterisks indicate that the miRNA overlaps with the annotated gene but in reverse orientation.

**Supplementary Figure S5.** Characterisation of an artificial id-miRNA. (A) Transgenic *C. reinhardtii* lines, transformed with the indicated plasmids, at 7 days after plating on solid media that contains spectinomycin. (B) Schematic representation of constructs carrying the cre-miR1157 intron precursor inserted in the middle of the spectinomycin resistance gene coding sequence (details as in Figure 4A). The region in which the PCR primers (black arrows) anneal is indicated. (C) Analysis of RT-PCR products generated from total RNA of three independent transgenic lines transformed with the indicated construct. Genomic DNA and RT negative controls were also used as template in the PCR reaction for each of the samples. RT-PCR products corresponding to *spect/intron(mi)* transgenic lines were run in a different agarose gel at the same time than the other samples; hence, a white line separate the two images.

**Supplementary Figure S6.** The effect of *dcl3* mutation on the accumulation level of mRNAs with id-miRNAs. Steady-state accumulation levels of the indicated mRNAs (see also Table 1 for more information about intron-derived miRNAs) is assessed as the number of normalized reads (Y-axis) in RNA-seq data. Error bars for 3 independent samples are shown.

A

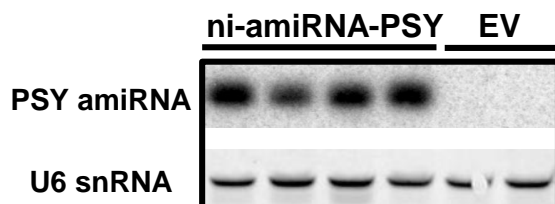

B

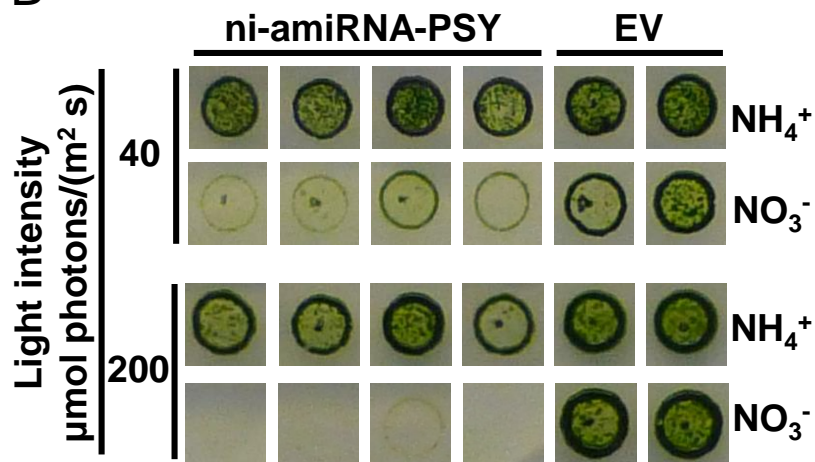

C

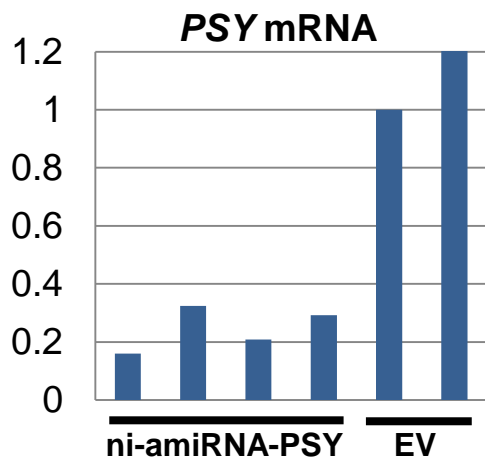

D

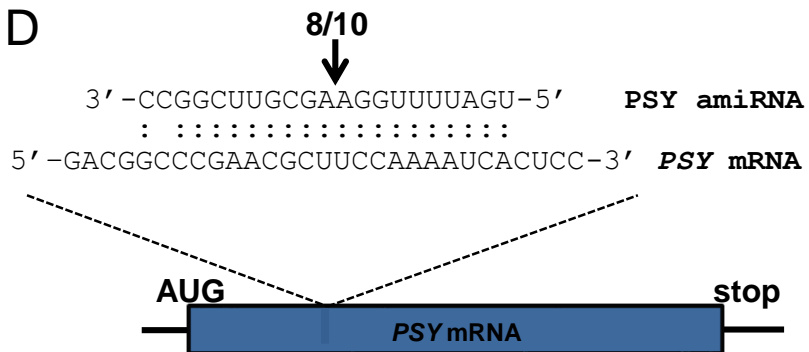

A

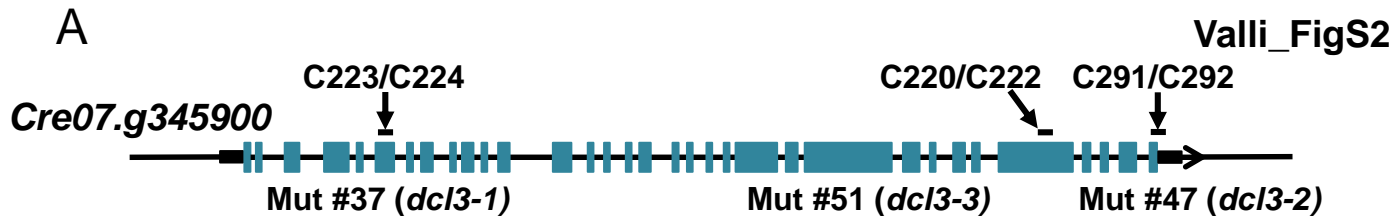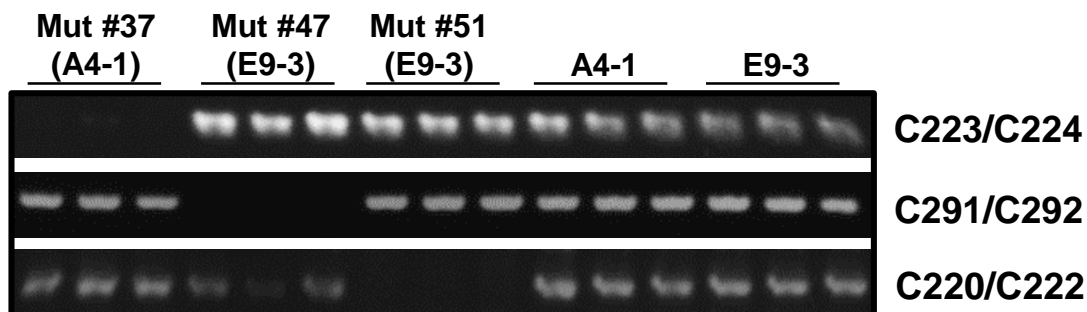

B

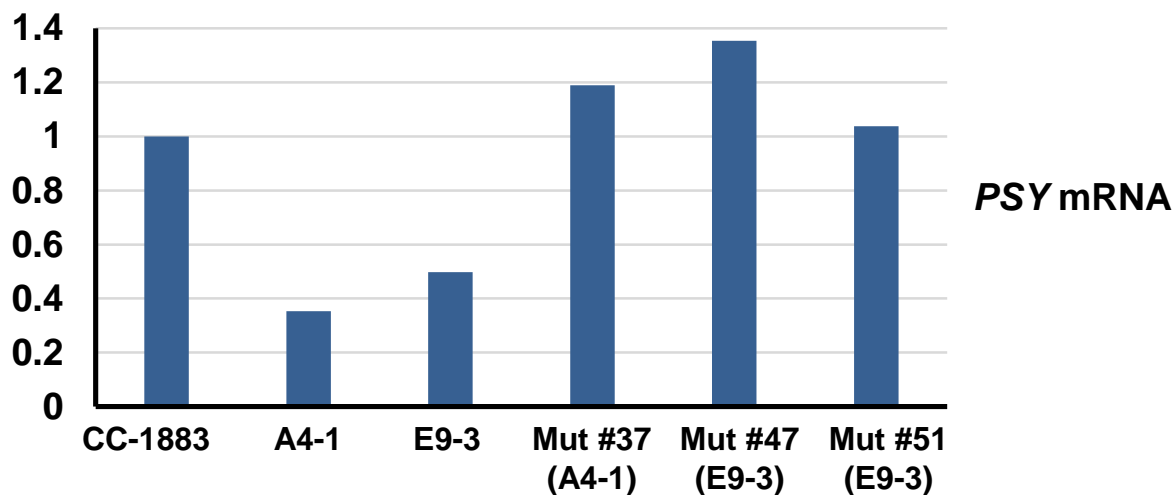

C

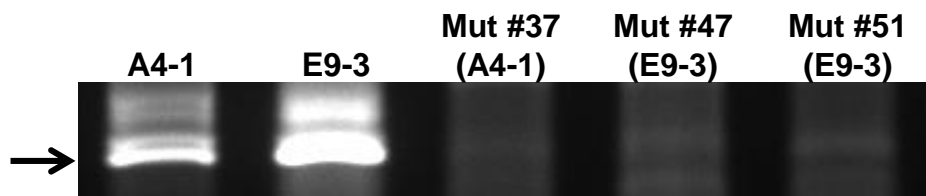

A

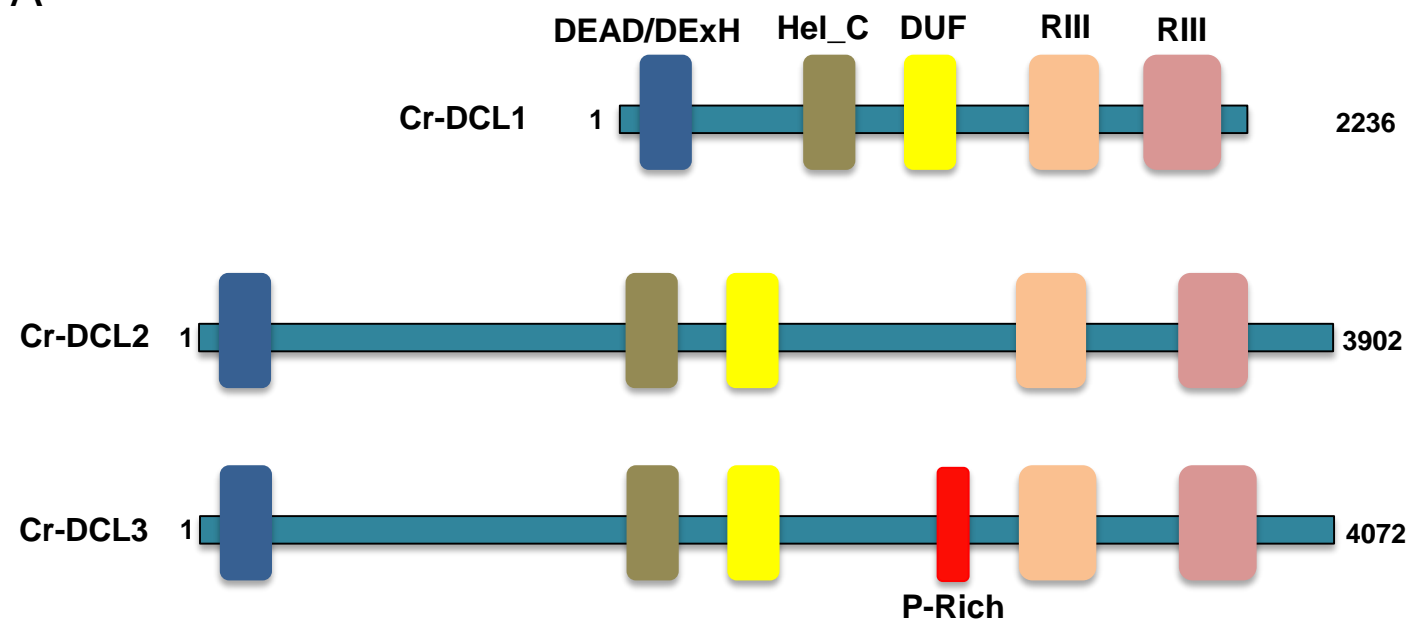

B

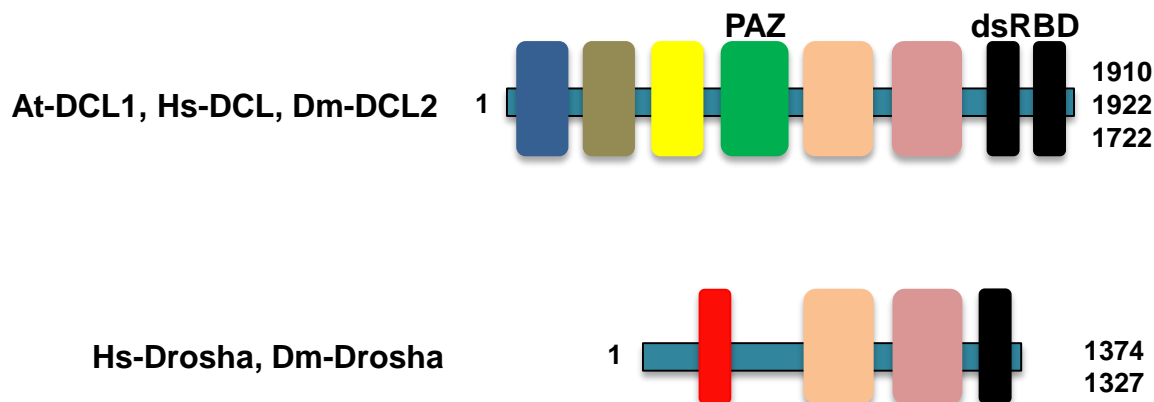

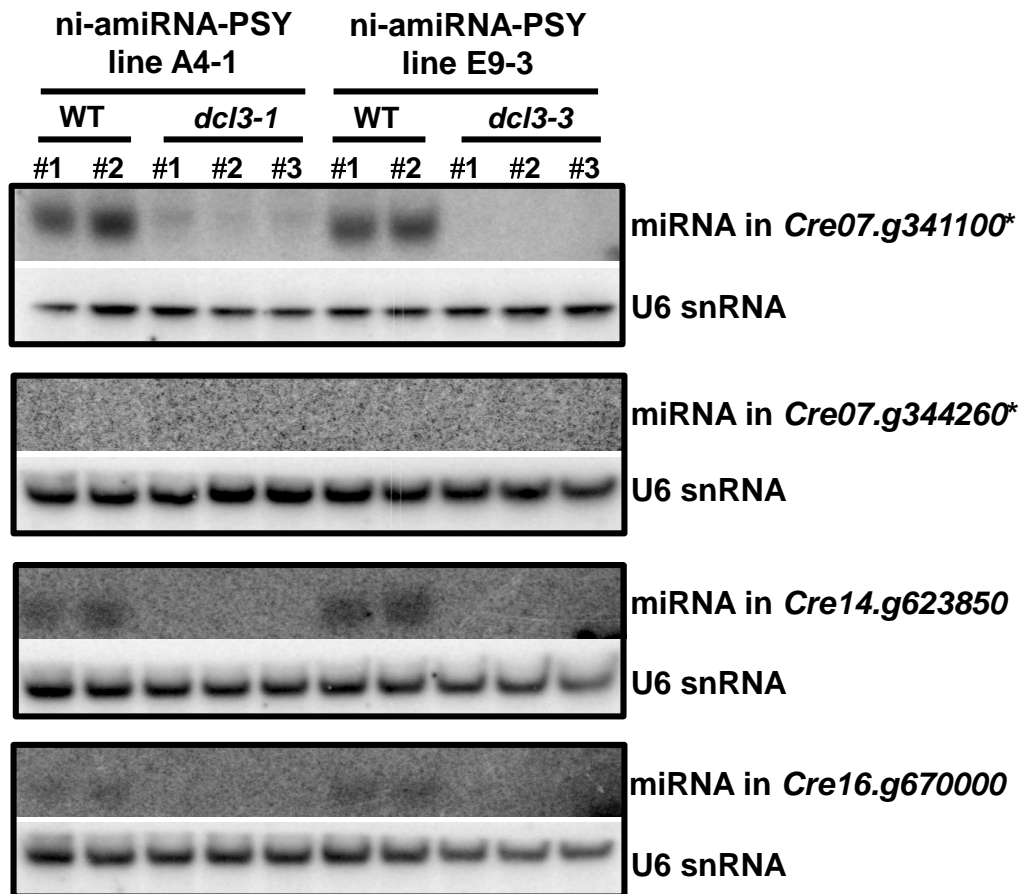

A

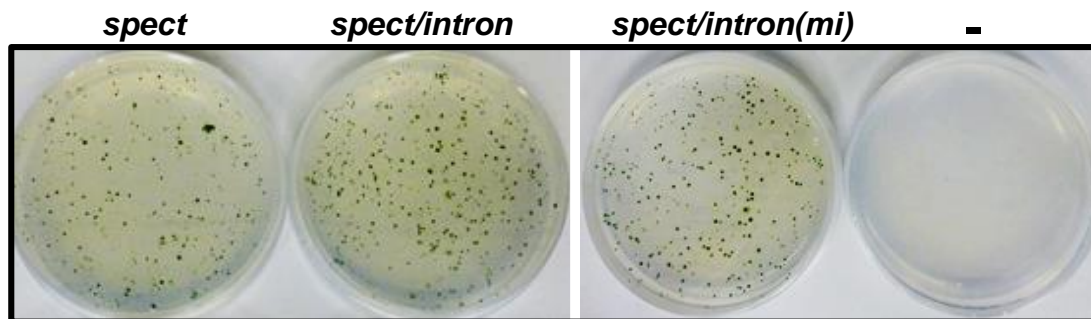

B

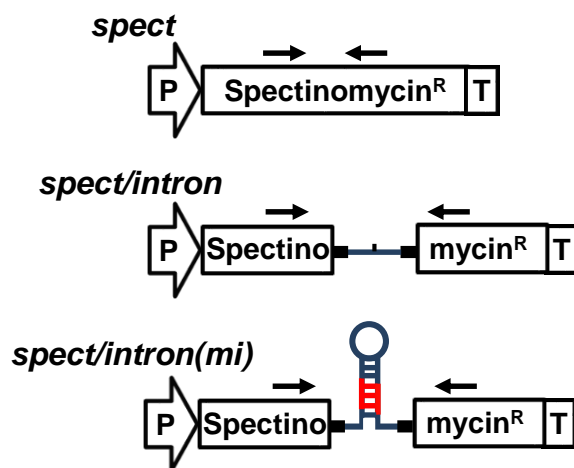

C

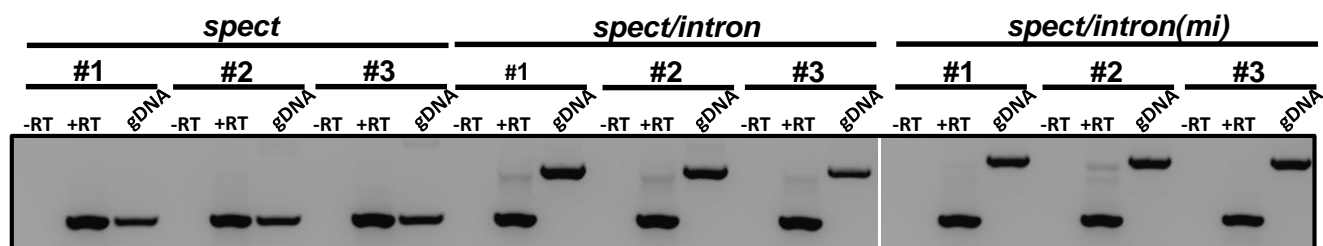

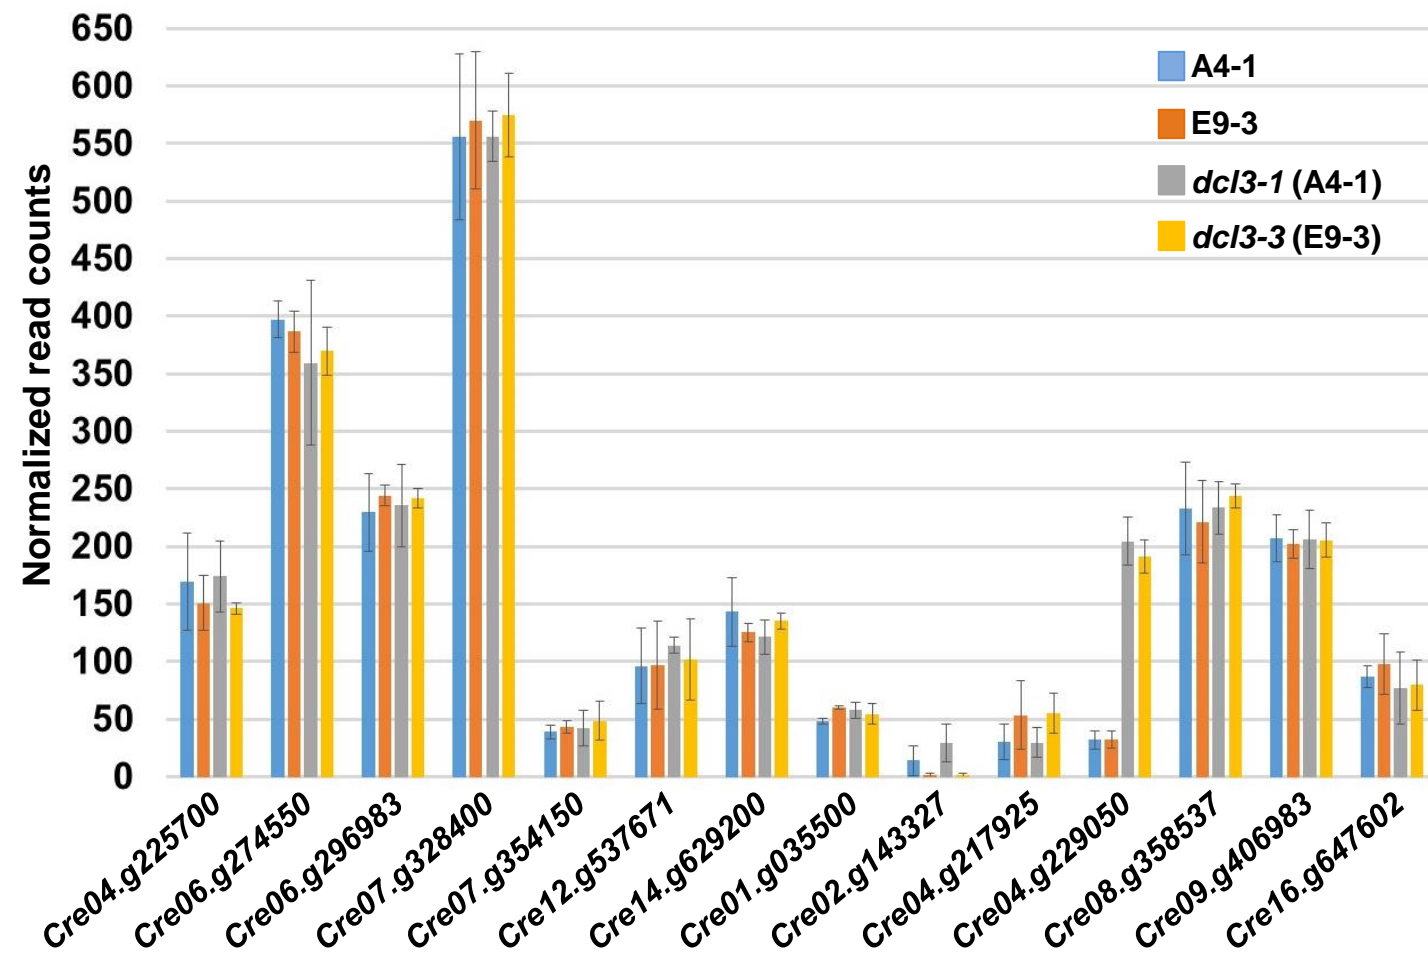

Supplement: Supplemental_Figures_with_Legends.pdf [file Supplemental_Figures_with_Legends.pdf]
