# Supplementary material for: Most microRNAs in the single-cell alga Chlamydomonas reinhardtii are produced by Dicer-like 3-mediated cleavage of introns and untranslated regions of coding RNAs
Source: Genome Res. 2016 Apr;26(4):519–29. doi: 10.1101/gr.199703.115 (PMC4817775; doi:10.1101/gr.199703.115)
Supplement: Supplemental Material [file supp_gr.199703.115_Table_S2.xlsx]

## Sheet: loci_overlaps_summary
Supplementary Table S2: Overlapping analysis of DCL3-dependent and DCL3-independent small RNA loci in C. reinhardtii
			DE
		Total	wt>dcl3	dcl3>wt	NDE
	Protein coding genes	3326	1970	741	615
	High conficence miRNAs	18	18	0	0
	Medium confidence miRNAs	24	24	0	0
	Repeats
	Inverted Repeats	1214	1026	102	86
	Tandem Repeats	770	614	98	58
	Simple Repeats
	[AGCT]+[_-]rich	77	68	9	0
	rnd-*	1450	1200	143	107
	Nucleotide repeat	225	205	10	10
	LTR Transposons
	gypsy	76	60	14	2
	LTR	84	79	3	2
	Non-autonomous LTR Transposons
	nonLTR	65	62	0	3
	novosib	4	4	0	0
	Non-LTR Transposons
	LINE	596	561	9	26
	RandI	29	20	6	3
	RE	62	28	1	33
	RTE	47	30	1	16
	SINEX	86	54	1	31
	DNA Transposons
	hAT	27	18	5	4
	Mariner	51	35	11	5
DE: differentially expressed
NDE: non-differentially expressed
