# Supplementary material for: Most microRNAs in the single-cell alga Chlamydomonas reinhardtii are produced by Dicer-like 3-mediated cleavage of introns and untranslated regions of coding RNAs
Source: Genome Res. 2016 Apr;26(4):519–29. doi: 10.1101/gr.199703.115 (PMC4817775; doi:10.1101/gr.199703.115)
Supplement: Supplemental Material [file supp_gr.199703.115_Table_S3.xlsx]

## Sheet: Sheet1
Supplementary Table S3: RNAseq data for the annotated genes that are differentially expressed between two independent dcl3 mutant lines (dcl3-1 and dcl3-3) and their corresponding wild type parental lines (A4-1 and E9-3). Number of normalize reads are indicated for three independent replicates of each sample.
		Wild type (Parental line A4-1)			Wild type (Parental line E9-3)			dcl3-1 (Parental line A4-1)			dcl3-3 (Parental line E9-3)
Rank	Gene ID	#1	#2	#3	#1	#2	#3	#1	#2	#3	#1	#2	#3	Likelihood	FDR**	Description***
1	Cre08.g358535	147	139	148	173	134	167	1711	1730	1652	1454	1619	1862	1	4.03588e-12	Non-coding RNA - Precursor of miR-cluster22587
2	Cre15.g640502	133	96	95	80	85	146	1171	1250	1202	1223	1129	1012	1	6.76437e-11	mRNA encoding for a putative DNA binding protein (346 aa) - siRNA-hairpin precursor at the 5'UTR
3	Cre13.g585175*	29	19	25	14	16	18	475	669	563	431	606	521	1	1.60791e-10	Joined annotation with Cre13.g585200. mRNA encoding for the Anaphase promoting complex subunit 1 (326 aa) - The precursor of miR-C112 is hosted by the 3' UTR
4	Cre16.g673200	27	36	19	39	31	30	253	293	269	261	261	281	1	2.2759e-10	mRNA encoding for a conserved putative protein (521 aa) - siRNA-hairpin precursor at the 3'UTR
5	Cre04.g220424	114	158	85	131	181	112	891	908	848	970	1053	1017	1	7.27508e-10	mRNA encoding for a conserved putative protein (257 aa) - siRNA-hairpin precursor at the 5'UTR
6	Cre35.g759297	45	41	34	36	31	41	423	585	525	387	461	682	1	1.21737e-09	Non-coding RNA - siRNA-hairpin precursor (annotated as cre-miR908 in miRBase)
7	Cre19.g750347*	33	12	34	22	11	34	285	282	275	286	268	260	1	1.77541e-09	Joined annotation with Cre19.g750297. mRNA encoding for a protein kinase (683 aa) - siRNA-precursor in a coding region
8	Cre07.g325757	94	90	75	100	58	95	579	777	650	631	621	856	1	2.48449e-09	mRNA encoding for a conserved putative protein (251 aa) - siRNA-hairpin precursor at the 3'UTR
9	Cre16.g694950	157	147	169	150	91	144	869	1009	894	789	822	1062	1	3.08305e-09	mRNA encoding for a protein kinase (410 aa) - The precursor of cre-miR1169 is hosted by the 3' UTR
10	Cre04.g229050*	35	38	23	28	41	28	195	229	190	176	204	194	1	4.17251e-09	Joined annotation with Cre04.g229026. mRNA encoding for an Inositol polyphosphate kinase 1 (745 aa) - The precursor of cre-miR1154 is hosted by an intron
11	Cre06.g300933	256	226	268	256	223	282	923	1293	1064	884	932	1114	1	5.547e-09	Non-coding RNA - siRNA-hairpin precursor
12	Cre17.g710950	123	93	88	111	99	109	377	437	402	400	447	531	1	8.05954e-09	Non-coding RNA - siRNA-hairpin precursor
13	Cre13.g585200*	22	13	6	8	6	19	183	190	217	216	261	199	1	1.09544e-08	Joined annotation with Cre13.g585175. mRNA encoding the Anaphase promoting complex subunit 1 (326 aa) - The precursor of miR-C112 is hosted by the 3' UTR
14	Cre14.g623850	22	25	21	16	20	18	173	195	139	143	135	195	1	1.60651e-08	mRNA encoding for a protein kinase (710 aa) - The precursor of a miRNA is hosted by the 3' UTR
15	Cre02.g143427	156	139	84	158	73	113	969	967	1045	830	745	973	1	1.89609e-08	mRNA encoding for a trypsin-like peptidase (276 aa) - The precursor of miR-cluster14712 is hosted by the 3' UTR
16	Cre19.g750297*	8	9	11	8	6	18	110	125	108	116	108	139	1	2.21222e-08	Joined annotation with Cre19.g750347. mRNA encoding for a protein kinase (683 aa) - siRNA-precursor in a coding region
17	Cre17.g704251	50	75	48	85	46	57	367	486	522	469	379	498	1	2.5515e-08	mRNA encoding for a conserved putative protein (219 aa) - an RNA hairpin that produces no small RNAs is hosted by the 3'UTR
18	Cre11.g467650	34	37	28	23	17	19	246	227	305	334	352	312	1	3.09517e-08	mRNA encoding for a conserved putative protein (523 aa) - siRNA-hairpin precursor at the 3'UTR
19	Cre06.g301725	137	132	117	129	106	128	347	377	422	436	467	377	1	3.73934e-08	Non-coding RNA - siRNA-hairpin precursor
20	Cre07.g339950	22	32	16	29	20	31	238	164	174	209	242	233	1	4.41129e-08	mRNA encoding for a conserved putative protein (223 aa) - siRNA-hairpin precursor at the 3'UTR
21	Cre17.g744697	76	60	52	61	63	75	276	232	261	346	299	254	1	5.2273e-08	mRNA encoding for a protein kinase (698 aa) - an RNA hairpin that produces no small RNAs is hosted by the 3'UTR
22	Cre01.g055300	12	24	16	15	5	16	162	209	182	129	170	186	1	6.03561e-08	Non-coding RNA - siRNA-hairpin precursor
23	Cre17.g721553	516	405	453	515	402	539	1608	2023	1807	1617	1649	2163	1	7.06472e-08	Non-coding RNA - siRNA-hairpin precursor
24	Cre12.g507100	24	29	35	34	26	30	146	216	230	165	144	176	1	8.34765e-08	Non-coding RNA - siRNA-hairpin precursor
25	Cre10.g422718	179	127	131	136	114	107	411	413	456	371	379	420	1	9.81844e-08	Non-coding RNA - siRNA-hairpin precursor
26	Cre12.g505151	6	19	7	11	2	11	330	208	265	395	442	341	0.999999	1.15596e-07	Non-coding RNA - siRNA-hairpin precursor
27	Cre07.g329950	144	123	96	55	57	89	814	786	787	563	597	668	0.999999	1.56015e-07	mRNA encoding for a conserved putative protein (282 aa) - siRNA-hairpin precursor at the 5'UTR (annotated as cre-miR1150 in miRBase)
28	Cre08.g358100	105	93	84	96	50	114	424	325	348	355	360	404	0.999999	1.88901e-07	Non-coding RNA - siRNA-hairpin precursor
29	Cre12.g486450	63	40	29	34	33	48	323	624	340	404	336	498	0.999999	2.21922e-07	Non-coding RNA - siRNA-hairpin precursor
30	Cre11.g477050	42	34	40	47	38	37	106	105	105	112	112	123	0.999999	2.53024e-07	mRNA encoding for a conserved putative protein (894 aa) - siRNA-hairpin precursor at the 3'UTR
31	Cre12.g517950	81	90	72	74	70	61	217	232	222	204	222	286	0.999999	2.88871e-07	Non-coding RNA - siRNA-hairpin precursor
32	Cre15.g634900	89	104	45	102	52	94	594	759	665	655	519	954	0.999998	3.31693e-07	Non-coding RNA - siRNA-hairpin precursor
33	Cre17.g725250	91	95	65	103	64	71	267	305	257	276	283	357	0.999997	3.94237e-07	Non-coding RNA - siRNA-hairpin precursor
34	Cre03.g170601	27	22	12	12	15	22	99	94	94	81	108	108	0.999997	4.62035e-07	Non-coding RNA - siRNA-hairpin precursor
35	Cre11.g467579	6	0	0	1	0	2	49	54	63	55	43	56	0.999997	5.29372e-07	mRNA encoding for a conserved putative protein (429 aa) - an RNA hairpin that produces no small RNAs is hosted by the 3'UTR
36	Cre07.g344172	47	59	47	33	64	33	163	242	254	205	238	235	0.999996	6.12051e-07	Non-coding RNA - siRNA-hairpin precursor
37	Cre06.g278206	212	170	126	109	126	199	606	458	528	607	602	549	0.999996	6.99483e-07	Non-coding RNA - siRNA-hairpin precursor
38	Cre07.g344260	34	22	21	26	14	39	134	151	178	119	153	154	0.999996	7.93513e-07	Non-coding RNA - Precursor of a miRNA
39	Cre02.g096737	70	81	51	61	88	49	299	336	284	278	280	445	0.999995	8.86443e-07	Non-coding RNA - siRNA-hairpin precursor
40	Cre16.g675200	23	23	27	17	8	16	132	212	130	148	172	161	0.999995	9.80781e-07	mRNA encoding for a conserved putative protein (881 aa) - siRNA-hairpin precursor at the 3'UTR
41	Cre17.g741601	6	8	8	3	4	7	58	101	63	74	58	92	0.999995	1.07151e-06	Non-coding RNA - siRNA-hairpin precursor
42	Cre13.g576700	19	13	14	15	11	13	75	99	79	76	93	133	0.999995	1.16094e-06	mRNA encoding for a conserved putative protein (603 aa) - The precursor of miR-cluster7085 is hosted by the 3' UTR
43	Cre06.g294776	27	21	17	24	26	19	107	177	135	99	152	185	0.999993	1.29443e-06	Non-coding RNA - Precursor of miR-cluster20399
44	Cre07.g317450	283	183	185	259	225	243	1235	2418	1339	1055	1347	2358	0.999993	1.42875e-06	Non-coding RNA - siRNA-hairpin precursor
45	Cre11.g467650	22	39	18	24	30	20	120	147	169	125	187	191	0.99999	1.60873e-06	mRNA encoding for a conserved putative protein (523 aa) - siRNA-hairpin precursor at the 3'UTR
46	Cre10.g459100	89	133	92	182	107	138	459	526	376	428	515	560	0.999988	1.83361e-06	mRNA encoding for a conserved putative protein (380 aa) - siRNA-hairpin precursor at the 3'UTR
47	Cre07.g317350	133	63	168	96	167	132	702	774	656	525	594	888	0.999986	2.07875e-06	Non-coding RNA - siRNA-hairpin precursor
48	Cre03.g164850	25	22	7	12	20	17	76	84	95	103	97	118	0.999985	2.33614e-06	mRNA encoding for a conserved protein with a HNH nuclease motif (261 aa) - siRNA-hairpin precursor at the 3'UTR
49	Cre07.g317601	127	185	108	222	178	208	890	1770	1219	1066	1324	1982	0.999984	2.5959e-06	Non-coding RNA - siRNA-hairpin precursor
50	Cre02.g078500	97	140	109	172	56	94	654	606	437	508	486	635	0.999984	2.8458e-06	Non-coding RNA - Precursor of cre-miR911
51	Cre10.g444300	411	342	152	204	182	212	1529	1454	1236	1080	1337	1665	0.999975	3.26269e-06	Non-coding RNA - Precursor of cre-miR9897
52	Cre24.g755697	27	19	7	15	16	7	221	184	151	262	219	124	0.999971	3.73728e-06	mRNA encoding for a protein kinase (730 aa) - The precursor of cre-miR1172 is hosted by the 3' UTR
53	Cre11.g467783	87	76	82	90	32	71	286	455	319	302	320	351	0.99997	4.20825e-06	Non-coding RNA - siRNA-hairpin precursor
54	Cre13.g579050	27	45	17	17	15	33	125	149	151	150	200	191	0.999966	4.74077e-06	mRNA encoding for the Anaphase promoting complex subunit 1 (326 aa) - siRNA-hairpin precursor at the 3'UTR
55	Cre10.g464300	64	76	76	83	72	80	153	195	146	167	161	194	0.999954	6.06357e-06	Non-coding RNA - siRNA-hairpin precursor
56	Cre16.g674938	9	4	8	5	2	7	273	184	57	112	171	239	0.99994	6.97402e-06	Non-coding RNA - siRNA-hairpin precursor
57	Cre01.g041650	56	25	21	37	21	13	228	158	155	213	236	291	0.99994	7.85853e-06	Non-coding RNA - siRNA-hairpin precursor
58	Cre17.g697800	50	44	46	41	38	54	126	138	157	107	98	149	0.999928	8.90327e-06	mRNA encoding for a protein kinase (569 aa) - an RNA hairpin that produces no small RNAs is hosted by the 3'UTR
59	Cre02.g117376	13	7	23	19	21	22	85	86	115	64	111	106	0.999928	9.92701e-06	Non-coding RNA - siRNA-hairpin precursor
60	Cre16.g674938	6	2	2	0	8	5	97	185	75	198	107	113	0.999927	1.09325e-05	Non-coding RNA - siRNA-hairpin precursor
61	Cre05.g233052	70	89	103	56	79	57	257	290	302	217	231	186	0.999921	1.19966e-05	Non-coding RNA - siRNA-hairpin precursor
62	Cre03.g155950	8	6	14	1	5	11	130	172	121	84	178	96	0.999917	1.30885e-05	mRNA encoding for a conserved putative protein (480 aa) - siRNA-hairpin precursor at the 3'UTR (annotated as cre-miR1165 in miRBase)
63	Cre11.g477700	50	33	43	29	50	47	137	212	144	123	131	168	0.999905	1.43223e-05	mRNA encoding for a conserved putative protein (898 aa) - siRNA-hairpin precursor at the 3'UTR
64	Cre16.g680350	368	371	321	350	360	539	1083	819	845	915	1050	970	0.999893	1.57079e-05	mRNA encoding for a conserved putative protein (237 aa) - an RNA hairpin that produces no small RNAs is hosted by the 3'UTR
65	Cre14.g623850	16	32	21	18	20	22	101	74	167	142	194	240	0.999865	1.746e-05	mRNA encoding for a protein kinase (710 aa) - The precursor of a miRNA is hosted by the 3' UTR
66	Cre14.g608600	56	69	64	54	41	63	234	130	148	174	174	229	0.99984	1.95292e-05	Non-coding RNA - siRNA-hairpin precursor
67	Cre06.g266052	7	5	12	6	23	11	57	83	68	91	76	64	0.999834	2.16225e-05	mRNA encoding for a conserved protein with a WD40 motif (855 aa) - siRNA-hairpin precursor at the 3'UTR
68	Cre02.g143527	133	181	126	124	55	80	405	558	549	422	410	601	0.999818	2.60637e-05	mRNA encoding for a trypsin-like peptidase (289 aa) - The precursor of miR-cluster14719 is hosted by the 3' UTR
69	Cre16.g677920	27	66	6	30	40	32	229	364	241	418	350	406	0.999809	2.83193e-05	mRNA encoding for a conserved putative protein (254 aa) - siRNA-hairpin precursor at the 3'UTR
70	Cre04.g229026*	36	39	26	26	12	14	84	90	118	106	86	91	0.999732	3.15623e-05	Joined annotation with Cre04.g229050. mRNA encoding for an Inositol polyphosphate kinase 1 (745 aa) - The precursor of cre-miR1154 is hosted by an intron
71	Cre12.g539850	0	0	0	0	1	0	20	12	15	24	10	14	0.999728	3.47725e-05	mRNA encoding for a conserved putative protein (739 aa) - siRNA-hairpin precursor at the 3'UTR
72	Cre09.g395954	77	43	35	69	39	93	301	334	275	261	264	506	0.999668	3.86849e-05	Non-coding RNA - siRNA-hairpin precursor
73	Cre12.g493903	457	366	277	273	317	384	969	1005	904	724	787	781	0.99966	4.26035e-05	Non-coding RNA - siRNA-hairpin precursor
74	Cre08.g371840	24	12	6	14	14	11	121	175	131	74	72	197	0.999641	5.04755e-05	Non-coding RNA - siRNA-hairpin precursor
75	Cre12.g501752	34	24	13	32	25	30	80	146	114	94	87	96	0.999601	5.4831e-05	mRNA encoding for a conserved putative protein (278 aa) - an RNA hairpin that produces no small RNAs is hosted by the 3'UTR
76	Cre16.g669500	54	45	44	45	31	38	107	136	90	116	115	165	0.99957	5.94685e-05	mRNA encoding for a protein kinase (747 aa) - siRNA-hairpin precursor at the 3'UTR
77	Cre12.g492500	63	50	61	125	90	50	442	542	339	253	306	464	0.999458	6.98478e-05	mRNA encoding for a conserved putative protein (408 aa) - an RNA hairpin that produces no small RNAs is hosted by the 5'UTR
78	Cre06.g284726	10	9	3	26	3	0	114	121	75	76	60	92	0.999234	7.81377e-05	Non-coding RNA - siRNA-hairpin precursor (annotated as cre-miR1160 in miRBase)
79	Cre17.g710881	62	50	41	66	38	55	92	204	163	195	187	246	0.999225	8.63339e-05	Non-coding RNA - siRNA-hairpin precursor
80	Cre03.g206250	96	127	77	95	79	102	298	284	297	213	209	194	0.999177	9.49041e-05	Non-coding RNA - siRNA-hairpin precursor
81	Cre07.g344186	5	7	1	19	13	48	136	118	108	191	126	186	0.999175	0.000103294	mRNA encoding for a conserved putative protein (327 aa) - siRNA-hairpin precursor at the 3'UTR
82	Cre10.g465000	86	44	44	62	45	44	116	157	139	171	139	150	0.999162	0.000111645	mRNA encoding for a protein kinase (566 aa) - The precursor of miR-cluster3318 is hosted by the 3' UTR
83	Cre06.g278217	0	0	0	0	0	0	9	24	27	8	33	24	0.999031	0.000121273	Non-coding RNA - siRNA-hairpin precursor
84	Cre04.g217938	32	33	24	34	20	39	66	104	102	88	102	77	0.999001	0.000131031	mRNA encoding for a kelch repeat domain-containing protein (802 aa) - siRNA-hairpin precursor is hosted by a coding exon
85	Cre12.g542600	231	202	192	271	173	187	427	531	452	385	445	600	0.998721	0.00014364	Non-coding RNA - siRNA-hairpin precursor
86	Cre01.g038350	7	4	6	6	3	8	42	38	21	20	37	34	0.99808	0.000178027	mRNA encoding for a trypsin-like peptidase (401 aa) - siRNA-hairpin precursor at the 5'UTR
87	Cre08.g358582	1053	935	1251	1117	797	1199	2299	2510	2073	1879	2137	2623	0.997785	0.000218923	Non-coding RNA - siRNA-hairpin precursor
88	Cre12.g540150	35	2	6	10	4	12	75	170	107	107	83	130	0.9977	0.0002406	Non-coding RNA - siRNA-hairpin precursor
89	Cre05.g239950	38	44	54	45	33	36	85	154	107	89	99	129	0.997658	0.000262263	mRNA encoding for a conserved putative protein (1053 aa) - The precursor of miR-C89 is hosted by a coding exon
90	Cre15.g634913	26	6	57	12	34	6	230	331	360	129	215	243	0.997222	0.000312842	Non-coding RNA - siRNA-hairpin precursor
91	Cre10.g422419*	38	29	81	37	50	51	118	242	175	120	152	160	0.997042	0.00033929	Joined annotation with Cre10.g422400 - mRNA encoding for a conserved putative protein (694 aa) - siRNA-hairpin precursor at the 3'UTR
92	Cre04.g229776	0	0	0	0	0	0	12	5	5	7	8	7	0.997	0.000365632	Non-coding RNA - siRNA-hairpin precursor
93	Cre02.g143407	272	332	242	203	189	252	588	872	736	541	469	648	0.996744	0.000393968	Non-coding RNA - siRNA-hairpin precursor
94	Cre13.g565301	74	56	28	94	90	127	280	313	375	245	226	242	0.99652	0.000423926	Non-coding RNA - siRNA-hairpin precursor
95	Cre06.g278132	235	199	197	279	185	278	590	375	473	535	485	612	0.996034	0.000457984	Non-coding RNA - siRNA-hairpin precursor
96	Cre14.g630775	75	114	60	99	46	130	202	486	451	320	389	383	0.996014	0.000491586	Non-coding RNA - siRNA-hairpin precursor
97	Cre10.g465726	15	27	14	21	16	11	76	92	56	54	51	107	0.995274	0.000569166	Non-coding RNA - siRNA-hairpin precursor
98	Cre12.g493903	224	115	95	98	93	45	377	391	325	292	351	472	0.995103	0.000609239	Non-coding RNA - siRNA-hairpin precursor
99	Cre13.g606900	474	443	424	532	372	413	846	826	715	686	732	950	0.994905	0.000650389	Non-coding RNA - siRNA-hairpin precursor
100	Cre11.g467587	3	5	13	11	7	46	59	67	57	55	48	44	0.994049	0.000698573	mRNA encoding for a protein kinase (448 aa) - an RNA hairpin that produces no small RNAs is hosted by the 3'UTR
101	Cre10.g422400*	30	38	75	51	42	31	144	198	155	91	151	199	0.993601	0.000749932	Joined annotation with Cre10.g422419. mRNA encoding for a conserved putative protein (694 aa) - siRNA-hairpin precursor at the 3'UTR
102	Cre03.g145307	67	27	46	47	33	62	202	205	122	111	120	121	0.992913	0.00080651	Non-coding RNA - siRNA-hairpin precursor
103	Cre08.g383750	30	30	32	42	4	23	160	146	115	110	120	78	0.991179	0.000877439	mRNA encoding for a conserved putative protein (296 aa) - an RNA hairpin that produces no small RNAs is hosted by the 3'UTR
104	Cre07.g330000	30	37	15	37	13	58	82	94	169	112	100	124	0.991116	0.000947671	Non-coding RNA - siRNA-hairpin precursor
105	Cre13.g579300	48	25	21	55	69	30	109	103	91	141	120	109	0.990684	0.00102044	mRNA encoding for a conserved putative protein (394 aa) - siRNA-hairpin precursor is hosted by a coding exon
106	Cre06.g278134	215	124	156	256	183	131	369	498	412	420	458	665	0.989315	0.00125851	Non-coding RNA - siRNA-hairpin precursor
107	Cre07.g339950	21	14	17	28	19	29	58	82	103	59	44	84	0.987714	0.00143601	mRNA encoding for a conserved putative protein (223 aa) - siRNA-hairpin precursor at the 5'UTR
108	Cre16.g677920	20	1	2	35	4	4	102	161	67	107	65	95	0.986483	0.00153585	mRNA encoding for a conserved putative protein (254 aa) - siRNA-hairpin precursor at the 3'UTR
109	Cre04.g220461	0	3	0	6	8	0	11	30	37	26	37	34	0.984056	0.00165396	Non-coding RNA - siRNA-hairpin precursor
110	Cre06.g296450	8	7	3	0	5	1	43	30	31	18	28	24	0.980889	0.00192244	mRNA encoding for a conserved putative protein (434 aa) - siRNA-hairpin precursor at the 3'UTR
111	Cre07.g317450	98	62	59	113	62	21	234	216	193	282	355	374	0.977962	0.00208337	Non-coding RNA - siRNA-hairpin precursor
112	Cre16.g690506	69	91	13	86	65	40	184	261	197	168	203	317	0.969475	0.00285089	Non-coding RNA - siRNA-hairpin precursor
113	Cre16.g694942	42	57	29	33	24	42	102	80	89	107	115	57	0.961811	0.00335993	Non-coding RNA - siRNA-hairpin precursor
114	Cre08.g371879	0	0	2	0	4	0	14	18	19	25	8	11	0.96053	0.00363349	Non-coding RNA - siRNA-hairpin precursor
115	Cre07.g332350	15	20	29	32	16	26	36	58	75	65	76	90	0.951991	0.00396713	Non-coding RNA - siRNA-hairpin precursor (annotated as cre-miR917 in miRBase)
116	Cre11.g476000	2075	1509	1273	1377	1064	1339	3001	3313	2798	2302	2592	3111	0.938979	0.0051354	Non-coding RNA - siRNA-hairpin precursor
117	Cre07.g312650	241	199	169	178	192	241	319	284	358	292	291	326	0.938605	0.00554606	Non-coding RNA - siRNA-hairpin precursor
118	Cre16.g682923	212	146	174	169	130	140	237	331	256	265	273	335	0.934238	0.00640472	Non-coding RNA - siRNA-hairpin precursor
119	Cre03.g176450	75	92	101	82	118	88	168	192	135	198	139	146	0.933785	0.00683194	Non-coding RNA - siRNA-hairpin precursor
120	Cre17.g735876	76	58	55	85	95	89	202	117	112	151	156	194	0.920277	0.0082437	Non-coding RNA - siRNA-hairpin precursor
121	Cre16.g647901	27	36	28	35	4	31	84	74	88	62	75	122	0.909177	0.00881717	mRNA encoding for a conserved putative protein (314 aa) - siRNA-hairpin precursor at the 3'UTR
* not an independent annotated gene as it is fused to another annotated gene in the list
** False Discovery Rate
*** miRNA nomenclature as in Table 1.
