# Supplementary material for: Most microRNAs in the single-cell alga Chlamydomonas reinhardtii are produced by Dicer-like 3-mediated cleavage of introns and untranslated regions of coding RNAs
Source: Genome Res. 2016 Apr;26(4):519–29. doi: 10.1101/gr.199703.115 (PMC4817775; doi:10.1101/gr.199703.115)
Supplement: Supplemental Material [file supp_gr.199703.115_Table_S4.xlsx]

## Sheet: Sheet1
	Suplementary Table S4: list of primers used in this study
	Name	Sequence (5'-3')
	amiFor-PSY	ctagtGGCCGAACGCTTCCAGGATCAtctcgctgatcggcaccatgggggtggtggtgatcagcgctaTGATTTTGGAAGCGTTCGGCCg
	amiRev-PSY	ctagcGGCCGAACGCTTCCAAAATCAtagcgctgatcaccaccacccccatggtgccgatcagcgagaTGATCCTGGAAGCGTTCGGCCa
	miR1157-Prec-For	CACGTGCGGGCTTGCAGAGGGTGTTGGGTCGGTGTTTTTGG
	miR1157-Prec-Rev	CAGCTGCAGGGGTGGGGGGTGGGTGGGGGTGGGGGTGTAACTAAGCCAGCCCAAACTATGC
	RBSC2_Pro-For	GGGCGCGCCAGAAGGAG
	Spect+intron1157-Rev	AACACCCTCTGCAAGCCCGCACCTGCTCCGGCACGGGGTC
	Spect+intron1157-For	ACCCACCCCCCACCCCTGCAGGACCTGTTCGAGGCTCTGAACG
	RBSC2_3'UTR-Rev	ACGACTCACTATAGGGCGAATTGGGTACCC
	amiFor-MAA7	ctagtCTGAAGTGCATTGTGTTCATAtctcgctgatcggcaccatgggggtggtggtgatcagcgctaTATGTACACAATGCACTTCAGg
	amiRev-MAA7	ctagcCTGAAGTGCATTGTGTACATAtagcgctgatcaccaccacccccatggtgccgatcagcgagaTATGAACACAATGCACTTCAGa
	HSP70-For	TATACATACGCGACTATTCTGCC
	Intron_Donor-MUT-Rev	TGCAAGCCCGCGTCTGCTCCGGCACGG
	Intron_Donor-MUT-For	GCCGGAGCAGACGCGGGCTTGCAGAGG
	SpeI-Rev	ACTTCAGACTAGTAGCTGGAACAC
	C220-DCL3-exon29-For	TCACGCCGCAGAAGCAGC
	C222-DCL3-exon29-Rev	GCAGTAGCAGTAGCAGCGACG
	C223-DCL3-exon6-For	CTCGCAACTTCTGATGACGACC
	C224-DCL3-exon6-Rev	GCGTGCAGCCGCAGAAGC
	C291-DCL3-exon33-For	ATCGGGGCTTCACATGCC
	C292-DCL3-3'UTR-Rev	TTGACCTGAGCCCGTGAGG
	amiRPSY-det	GGCCGAACGCTTCCAAAATCA
	miR1151b-det	TAACAGGTTATGAGCCCCGGA
	miR1157-det	CACCTGGTCCCGCTACCTGAA
	miR1162-det	GCAGGGCTAAACTACTACAACA
	siRgypsy-det	TCTCCGCGTTCTCGCCGCGCA
	miR_Cre07.g341100-det	GGGCATGAGCTCTGGCTGGCA
	miR_Cre07.g344260-det	GGTGCAGAGATGAACCACAGC
	miR_Cre14.g623850-det	TGAGGGAATCAGAGCCAACA
	miR_Cre16.g670000-det	CATGCACAAGGATCTCCAGACA
	PSY-qPCR-for	CAGTGCCACGAGGCTTCAAGTG
	PSY-qPCR-rev	CCCAGCGGTCTAGTGCCTTCGG
	Spect-For	ACATCGACCTGCTCGTGAC
	Spect-Rev	TCTCGTTCAGAGCCTCGAAC
	CBLP2-For	GCCACACCGAGTGGGTGTCGTGCG
	CBLP2-Rev	CCTTGCCGCCCGAGGCGCACAGCG
	PSY-Rev	ACATCGCGCAGGATGTTGG
	PSY_nested-Rev	TTGTAAGTGGGCTCGATACCC
	OMT2-Rev	ATGAAGGCGGACACCACC
	OMT2_nested-Rev	AGCATGATTCCCACGATGATG
	CPLD52-Rev	GCTCTCAGCCACCCTAGCACCAGTC
	CPLD52_nested-Rev	CGCTAGCAGCCCCTTCGACATAAC
