# Supplementary material for: Most microRNAs in the single-cell alga Chlamydomonas reinhardtii are produced by Dicer-like 3-mediated cleavage of introns and untranslated regions of coding RNAs
Source: Genome Res. 2016 Apr;26(4):519–29. doi: 10.1101/gr.199703.115 (PMC4817775; doi:10.1101/gr.199703.115)
Supplement: Supplemental Material [file supp_gr.199703.115_Table_S5.xlsx]

## Sheet: Sheet1
		Table S5: Sequencing statistics for sRNA-seq and RNA-seq data
		sRNA-seq:
ArrayExpress sample name	Description	Genotype	Raw reads	Trimmed reads	Filtered reads	Aligned reads	Non-redudant aligned reads
ERS826208	Parental A4-1	Parental line A4-1 (biological replicate 1)	14337341	10877524	8324537	2710610	126076
ERS826212	Parental A4-1	Parental line A4-1 (biological replicate 2)	16493128	13249484	10697908	2461336	134634
ERS826213	Parental A4-1	Parental line A4-1 (biological replicate 3)	12166835	9992900	8538156	1971500	124341
ERS826214	Parental E9-3	Parental line E9-3 (biological replicate 1)	15049517	9554114	7875082	2417457	143920
ERS826215	Parental E9-3	Parental line E9-3 (biological replicate 2)	16288080	9443269	8745108	3403700	143308
ERS826216	Parental E9-3	Parental line E9-3 (biological replicate 3)	12515736	7949802	6849881	2071538	101357
ERS826217	A4-1 background - dcl3 KO	dcl3-1 line A4-1 (biological replicate 1)	12248737	7555905	5651262	2066034	106526
ERS826218	A4-1 background - dcl3 KO	dcl3-1 line A4-1 (biological replicate 2)	12285320	7630061	6519099	2503188	127464
ERS826219	A4-1 background - dcl3 KO	dcl3-1 line A4-1 (biological replicate 3)	12130087	7215559	5880106	2146275	134014
ERS826209	E9-3 background - dcl3 KO	dcl3-3 line E9-3 (biological replicate 1)	15132281	8553122	7466940	3213844	150197
ERS826210	E9-3 background - dcl3 KO	dcl3-3 line E9-3 (biological replicate 2)	13019979	7229840	6481281	2702100	95261
ERS826211	E9-3 background - dcl3 KO	dcl3-3 line E9-3 (biological replicate 3)	14552786	8817246	7491920	2284475	148869
		RNA-seq:
		Genotype	Raw Reads (Pairs)	Trimmed			Filtered		Transcriptome alignment
				Paired	Forward	Reverse	Paired	Unpaired	Paired	Unpaired
		Parental line A4-1 (biological replicate 1)	13886161	7433096	4550213	460721	7064630	4767232	6592077	4792137
		Parental line A4-1 (biological replicate 2)	15337293	8352421	4914672	500004	8009101	5198443	7482327	5212921
		Parental line A4-1 (biological replicate 3)	15491827	8347877	4999874	507676	7934259	5243351	7426020	5263919
		Parental line E9-3 (biological replicate 1)	16599675	9318518	5092812	555081	8974146	5450003	8380598	5500356
		Parental line E9-3 (biological replicate 2)	15681937	8526691	5003915	524415	8074926	5243277	7531846	5264781
		Parental line E9-3 (biological replicate 3)	17662059	9359234	5836548	558101	8907217	6098983	8323089	6112796
		dcl3-1 line A4-1 (biological replicate 1)	15741117	8532151	5002366	516254	8178972	5300465	7636407	5326367
		dcl3-1 line A4-1 (biological replicate 2)	16839672	9441018	5123625	557596	9129819	5502266	8536735	5543562
		dcl3-1 line A4-1 (biological replicate 3)	14706055	8297417	4422605	499728	7969817	4737782	7479705	4764512
		dcl3-3 line E9-3 (biological replicate 1)	15812036	8647333	5006047	528349	8353328	5355975	7805116	5354132
		dcl3-3 line E9-3 (biological replicate 2)	17669687	9422131	5813390	579823	9066870	6158800	8490761	6159743
		dcl3-3 line E9-3 (biological replicate 3)	15369227	8628285	4691345	504731	8196592	4953822	7704275	4985168
