# Supplementary material for: Most microRNAs in the single-cell alga Chlamydomonas reinhardtii are produced by Dicer-like 3-mediated cleavage of introns and untranslated regions of coding RNAs
Source: Genome Res. 2016 Apr;26(4):519–29. doi: 10.1101/gr.199703.115 (PMC4817775; doi:10.1101/gr.199703.115)
Supplement: Supplemental Material [file supp_gr.199703.115_Table_S6.xlsx]

## Sheet: Paper libraries
Table S6: Prediction of miRNA precursors in the genome of C. reinhardtii
	mirdeep2		miRDP	mirCat
Sample	Known	New
Parental line A4-1 (biological replicate 1)	23	113	127	404
Parental line A4-1 (biological replicate 2)	22	136	162	381
Parental line A4-1 (biological replicate 3)	21	116	148	415
Parental line E9-3 (biological replicate 1)	22	108	131	286
Parental line E9-3 (biological replicate 2)	22	111	113	338
Parental line E9-3 (biological replicate 3)	25	121	136	415
dcl3-1 line A4-1 (biological replicate 1)	15	125	177	636
dcl3-1 line A4-1 (biological replicate 2)	18	127	165	538
dcl3-1 line A4-1 (biological replicate 3)	17	95	143	606
dcl3-3 line E9-3 (biological replicate 1)	13	65	129	457
dcl3-3 line E9-3 (biological replicate 2)	15	80	103	437
dcl3-3 line E9-3 (biological replicate 3)	21	86	155	654
Combined miRNAs by method	35	580	585	4666
Combined all methods	5898
Filtered miRNAs	100
Manual curation	42

## Sheet: Sheet2
	mirdeep2		miRDP	mirCat
	Known	New
SL2108	25	104	140	365	10790
SL2121	28	119	162	367
SL2122	24	103	123	329
SL2310	23	113	127	401
SL2311	22	136	162	397
SL2312	21	116	148	422
SL2313	22	108	131	294
SL2314	22	111	113	129
SL2315	25	121	136	414
SL2316	15	125	177	0
SL2317	18	127	165	0
SL2318	17	95	143	0
SL2319	13	65	129	0
SL2320	15	80	103	0
SL2321	21	86	155	0
SL2322	22	128	144	0
SL2323	22	143	172	0
SL2324	20	124	157	0
SL2325	20	110	118	0
SL2333	25	129	176	0
SL2327	24	106	142	0
SL2328	20	114	154	0
SL2329	19	148	240	0
SL2330	19	129	137	0
SL2331	22	104	120	0
SL2332	19	132	152	0
SL2333	25	129	173	0
Combined per method and filtered	16	63	74	41
Combined between 3 methods	147
Manual curation				43
