# Supplementary material for: Most microRNAs in the single-cell alga Chlamydomonas reinhardtii are produced by Dicer-like 3-mediated cleavage of introns and untranslated regions of coding RNAs
Source: Genome Res. 2016 Apr;26(4):519–29. doi: 10.1101/gr.199703.115 (PMC4817775; doi:10.1101/gr.199703.115)
Supplement: Supplemental Material [file supp_gr.199703.115_Table_S7.xlsx]

## Sheet: mirna_final_coordinates (1)
Table S7: Exact location and sequence of predicted miRNAs
Chromosome	Precursor start	Precursor end	Strand	miRNA	miRNA*	Precursor
chromosome_1	3724965	3725113	+	ACACATGGAACAACACAACA		TTGTGTTGTTCCATGTGTCATCATGCATGCTTAACCCGTTTCTCTCTGGGCCGGAGACGGCATGCTTAACCCTCTCTGGGCCGGAGACCGTCTCCGGCCCAGAGAGGAACGAGTTAAGCATGCATGATGACACATGGAACAACACAACA
chromosome_1	5106349	5106475	+	TTCGAAAAGTTGCACAGCGCC		TTCGAAAAGTTGCACAGCGCCCCCTGCCCCCCTCCCCTTGTCCCTGTTGGCCCCTGGCCACACGAGGGCCAGGGGGCAACAGGGACAAGGGGAGGGGGGCAGGGGGCGCTGTGCACCTTTTCGAATG
chromosome_1	7070552	7070605	-	TCCAGCTGGGCGGCCGTCTC		TCCAGCTGGGCGGCCGTCTCCTTGCCGCTGCCGAACCGGCCCTCCAGCTGGGCG
chromosome_10	3399870	3399999	-	TTACGGCTCCTTCTTATCGGC		CGATAAGAAGGAGCCGTAAGGTACCGGGCGTGGGGAGGGCAGGGGCAGGGACGGGGATCAGGGGCAGCTGATCCCCGTCCCTGCCCCTGCCCTCCCCGCGCCCGGTACCTTACGGCTCCTTCTTATCGGC
chromosome_10	6282484	6282565	-	TCAATTGCTCTTTCTGATGA	TCAGATAGAGCAATTGATGA	TCAATTGCTCTTTCTGATGAGCGATGCCGTGGCCTCCGCGTCCAGGCCACGGCATCGCTCATCAGATAGAGCAATTGATGA
chromosome_12	6402226	6402307	-	TTCAGGTAGCGGGACCAGGTG	ACCTGGTCCCGCTATTTGAAT	ACCTGGTCCCGCTATTTGAATCTCGCTGATCGGCACCATGGGGGTGGTGGTGATCAGCGCTATTCAGGTAGCGGGACCAGGTG
chromosome_13	2001067	2001197	-	TTCCACCTGACTGCTTGCTGA		AGCAAGCAGTCAGGTAGAAGCGCCGAGTAGGAGTGAGAGTCAGTGGGGTATGTAAGCGTCTTGCTCGTAGCCGCTTATATACCCCTCTGACTCTCACTCCTACTCGGCGCTTCCACCTGACTGCTTGCTGA
chromosome_13	2127530	2127632	+	CAGGGCTGTTGCTCGCACCA		GTGCGAGCAACAGCCCTGGTACGGACACCAGCAGCACAGAATGCGAATGGGCGACGGTGGCGGGTGTCCGTTGTTGCTCGCACCAGGGCTGTTGCTCGCACCA
chromosome_13	3152367	3152452	-	ACATCCTTGGTACACATGAAA	TCATGTGTACCAAGGACGTGA	TCATGTGTACCAAGGACGTGATGGCTCGCAGTCTTTTGTTCTACGTAAAAGACTGCTAGCCATCACATCCTTGGTACACATGAAA
chromosome_14	2347075	2347211	-	TGTTGGCTCTGATTCCCTCA	AGGGATTAGAGCCCACATGT	CCGCCCTTTGAGGGATTAGAGCCCACATGTAGCCAGGTCTTGATTGTCTAGTGATGATCAAGACCTGGCTACATGTTGGCTCTGATTCCCTCACATAGGATTGG
chromosome_14	3218783	3218866	-	AGCAGCGTCGGGCTCGACCGC	CGTTGAGCCCGACGCTGCTGC	CGTTGAGCCCGACGCTGCTGCCGCCGCGCCGGTGCTGCTGCGCGGCAGCACCTGACCGGCTGCAGCAGCGTCGGGCTCGACCGC
chromosome_16	185088	185174	-	TGGATGTTGCTTGCTGGATAC	ATCCAGCAAGCAACATCCACA	ATCCAGCAAGCAACATCCACATAAGCCGGGGTTGGTAGCAACACATCTACCAACCCCGGCTTATGTGGATGTTGCTTGCTGGATAC
chromosome_16	828236	828325	-	TTTCCGAATCTGGCTCGGCCT	GCCGAGCCAGATTCGGAAAAC	GCCGAGCCAGATTCGGAAAACTCTACCGGAGCGGCACCGATTCAATGTGGTCGCCGCTCGGGTGGAGTTTTCCGAATCTGGCTCGGCCT
chromosome_16	4056196	4056281	-	TGTCTGGAGATCCTTGTGCATG	TGCACAAGGATCTCCGAACACC	TGCACAAGGATCTCCGAACACCTTGCTATCGGTGAGCCTAACGCTGGCTCACCGATAGCAAGGTGTCTGGAGATCCTTGTGCATG
chromosome_17	5149811	5150023	+	TAGGATGGAGCGAACTTGCACC		TGCAAGTTCGCTCCATCCTAGCATATGGTTGTGAAGTGTGGGGACCCGACATATTAGCGGAAATGCTGGACGGCGGTCCAGCCCTCCTGCGGTCCGTGCGCCGGGTTATTGCTGTCACGTCGCCGCGGTGGTGGGCCGCCGTCCAGCATTTCCGCTAATATGTCGGGTCCCCACACTTCACAACCATATGCTAGGATGGAGCGAACTTGCACC
chromosome_17	6144120	6144204	+	TCGCCTTGTCTGTTTATGTGG	ACATAAACAGACAAGGCGACC	TCGCCTTGTCTGTTTATGTGGAGCAGGGCAGGCCGCAAATGCATTGGCGGCCTGCCCTGCTCCACATAAACAGACAAGGCGACC
chromosome_2	739310	739389	+	ACAATAGTAGTACGGCCATT	TGGCCGTACTACCATTGTCA	TGGCCGTACTACCATTGTCATGTCTGACTGCATCATGACACATGATGCAGTCAGACATGACAATAGTAGTACGGCCATT
chromosome_2	2217872	2218043	-	TTGACACTCATCACACTGGCC		CCAGTGTGATGGGTGTCAAGGGCCACTTCGACCTGAAGCCTGCGAAGCGGCAGCGCCATGTAGAACTCGAGCACGCCGACCACGCTGCTGCTCGGCGTGCTCAAGCCCTATGTGGCGCTGCCGCTCCGCAGGCTTCAGGTCGAAGTGACCCTTGACACTCATCACACTGGCC
chromosome_2	8349161	8349264	+	CCCCGACACCCCCGATGGACA	TTCCGATCGCGGGGTCGGGAT	TTCCGATCGCGGGGTCGGGATGGGGGCAAAAAACAACTTGTTAATCAACTCATCAAGTTGTTATTGCGTGCGCACCCAATCCCCCCGACACCCCCGATGGACA
chromosome_2	9101133	9101252	+	TCGGAAAGGAATCCAACGGCCT		GCCGTTGGATTCCTTTCCGACGCAGCGGCAGTGTCTCAGTACGAGCGACATAGGCCCATTAGAGCCCTTGTCGCTCGTACTGAGACACTGCCGCTGCCTCGGAAAGGAATCCAACGGCCT
chromosome_2	9129508	9129593	-	CGTGCTTGCGCCCTCTAGCCG	CGGCTAGAGGGCGCAAGCACG	CGGCTAGAGGGCGCAAGCACGCAAGGAGGGGATGACGAGCATCGTGCTCGTCATCCCCTCCTTGCGTGCTTGCGCCCTCTAGCCG
chromosome_2	9173306	9173389	+	TCGTGCTCGTCATCCCCTCG	AGGGGATGACGAGCACGATG	AGGGGATGACGAGCACGATGCGGGCCTGATACAGCCTCGTCGCCCGCCTGTATCAGGCCCACATCGTGCTCGTCATCCCCTCG
chromosome_3	6573899	6573980	-	TGACATGCGGTGAATGTGAAT	CACATTCACCGCATGTCAC	CACATTCACCGCATGTCACCGCCGGAACCAACACGACACCTGTCGTGTTGGTTCCGGCGGTGACATGCGGTGAATGTGAAT
chromosome_4	457829	457914	-	AGGCAGCGCGGGGCTGGTGCT	AGCAGCCCCGCGCTGCCTGCT	AGGCAGCGCGGGGCTGGTGCTGTTGGTGGAAGAGGACAGGCGCCCGTCCTCCTCCTCCACCAGCAGCAGCCCCGCGCTGCCTGCT
chromosome_4	3100624	3100751	+	TTGTAATTGCCGGTAGCACT	AGTGCTGCTAGCAACTACAAG	TGGGCCATCGTATTACTATCAGTGCTGCTAGCAACTACAAGGCGGGCATGAAGGTCGATTTGATCCGATCGACCTTCATGACCGCCTTGTAATTGCCGGTAGCACTGATTGTAATGCGATGGCTCATT
chromosome_4	3694793	3694875	-	ACTTAGTCATCCCAAGGCGTG		ACTTAGTCATCCCAAGGCGTGTATCACCCATGTTACGGGCGACCTGTAACACGGGTGATACACGCCTTGTGACGACTAAGTTA
chromosome_4	3820425	3820510	+	AAGGCGGATGCCGAGAGCCTGG	AGGCTCTCGGCATCCGCTTCC	AAGGCGGATGCCGAGAGCCTGGTGGAGGCGGTGGCTGAAGCTGCGCTCAGCGAGCGCCTCCACCAGGCTCTCGGCATCCGCTTCC
chromosome_5	1790702	1790791	+	TACATTCTTGGAGACACGGCC	CCGTGTTTCCAAGGATGTATA	CCGTGTTTCCAAGGATGTATACAAGCGAAGTCGAGACTTTGGTATTACATACTCCCACTTCGCTTTTATACATTCTTGGAGACACGGCC
chromosome_5	3227666	3227753	+	AGGCGTGAAAAGTGTGGAATG	TTCCACACTTTTCACGCCTCT	TTCCACACTTTTCACGCCTCTCGCCCAGAAGGCAGCAGCAGTTCCCGCTGCTGCCTTCTGGGCGAGAGGCGTGAAAAGTGTGGAATG
Chromosome_6	6776108	6776193	+	TAGAGCTCGAAGAACTTGGGA	CCAAGACCTTCGAGCTCTACC	CCAAGACCTTCGAGCTCTACCCGAACGTCGAGTTCAAGTACAGTACTTGAACTCGACGTTCGGGTAGAGCTCGAAGAACTTGGGA
chromosome_6	7063792	7063881	-	AAGACGGCGCACCTTCTTAAC	TAAGAAGGTGCGCTGTCTTGA	AAGACGGCGCACCTTCTTAACGTCCTTCGGTGCTTGCTTGCACACACTCAAGCAGGCACCGAAGGGCGTTAAGAAGGTGCGCTGTCTTGA
chromosome_6	3067368	3067456	+	TGTTGTAGTAGTTTAGCCCTGC	CGGCCTAAATTACTACAACACG	CGGCCTAAATTACTACAACACGCCGCGCCTGGACCCGAGGGAGGACCCCTCGGGACCCGGTACGTCGTGTTGTAGTAGTTTAGCCCTGC
chromosome_7	2371057	2371142	-	ACGGGTTGTGGGACCCGGACT	TCCGGGGCTCATAACCTGTTA	TCCGGGGCTCATAACCTGTTAACGCGCGCAGCCCGCAGGCAGTCCCTGCGGGCCGCGCGGTGCTAACGGGTTGTGGGACCCGGACT
chromosome_7	2372822	2372907	-	ACGGGGTGTGGGACCCGGACT	TCCGGGGCTCATAACCTGTTG	TCCGGGGCTCATAACCTGTTGACGCGCGCAGCCCGCGGGCAGTCCCTGCGGGCCGCGCGGCGCTAACGGGGTGTGGGACCCGGACT
chromosome_7	4386252	4386309	-	TGCCAGCCAGAGCTCATGCCCC	CATGTCGGGGCAACGGCGGCT	GCCATGTCGGGGCAACGGCGGCTGCGCTCACTGTGACCCAGACGAGTGCCAGCCAGAGCTCATGCCCCTGGC
chromosome_7	4631481	4631544	-	GCTGTGGTTCATCTCTGCACC	GCCTAGGATGTGGAGCTGCCC	GCCTAGGATGTGGAGCTGCCCAGCCGCACTGACGAGTGATTGGTGATGCGCGCTGTGGTTCATCTCTGCACC
chromosome_7	5632709	5632783	-	TGCGGACGAGACTTTAGCATG	TGCTCAAGTCACGGCCGCAAC	TGCTCAAGTCACGGCCGCAACCACACTGGCAGTGATCTGTACGCATGCAAGGTTGCGGACGAGACTTTAGCATG
chromosome_7	5926395	5926482	+	TCCGGTCAAAGCTATTGGCCC	GCCAACAGCTTTGACCGGAAG	GCCAACAGCTTTGACCGGAAGCCTTGGTGATCTCAATGAGACGCAATGATTGGGATCACCAAGGCTTCCGGTCAAAGCTATTGGCCC
chromosome_8	121858	121942	-	TAGGACCGACGAAAGCCACT	TGGCTTTCGTCGGTCCTAGG	TGGCTTTCGTCGGTCCTAGGCGGCGCGTGTGCGCGCGTCCGCGTCCGCGCGCACACGCGCCGCCTAGGACCGACGAAAGCCACT
chromosome_8	126807	126910	-	TTGTCCATAGGAGTTGCGGACG		TCTGAACCTCCTATGGATAAGAGCAAAGGCCCCGCTGAATAAAGGGAATTGAATTGAGTAAGGTTCAGCGAGGCATTAGCCCTTGTCCATAGGAGTTGCGGACG
chromosome_9	6365928	6366014	-	TCCAGGATCTAGCTGTCGTCT	ATGATAGTTGGATCCTGGACG	ATGATAGTTGGATCCTGGACGCCGAAGGCCATCATGCGGTGTCAACCGCATGACGGCCGTTGGCGTCCAGGATCTAGCTGTCGTCT
scaffold_24	82182	82317	+	TAGGATCGGAGACGCAGTGAAG	TCCGCTGAGTGTCCGAATCTAC	CAGTAGGATCGGAGACGCAGTGAAGCCCCCTTGCTGCTGCGATTCTTTCCGACTTACAACGTGCTCGTGGCGAGCACATTGTAGGTGTAGAGGATTGCAGCAGCAACGGGGCTCCGCTGAGTGTCCGAATCTACTG
